# Supplementary material for: The enhanced anti-obesity effect and reduced gastric mucosa irritation of capsaicin-loaded nanoemulsions
Source: Royal Society of Chemistry journal article supplement (doi:10.1039/c7fo00173h), 2017-01-01
Supplement: c7fo00173h1.pdf [file c7fo00173h1.pdf]

### Supplementary Material

**Table S1.** Changes in body weight, food intake, and tissue weight among groups in male SD rats.

| Variables                                 | ND <sup>a</sup><br>(A1) | HFD <sup>b</sup><br>(A2) | HFD+C <sup>c</sup><br>30 mg/kg<br>(B1) | HFD+C-NE <sup>d</sup><br>30 mg/kg<br>(B2) | HFD+C-NE<br>60 mg/kg<br>(B3) | HFD+C-NE<br>90 mg/kg<br>(B4) | HFD+WM <sup>e</sup><br>(B5) |           |
|-------------------------------------------|-------------------------|--------------------------|----------------------------------------|-------------------------------------------|------------------------------|------------------------------|-----------------------------|-----------|
| Initial body weight (g)                   | 138.3±6.7               | 138.7±3.8                | 137.1±7.3                              | 134.9±3.2                                 | 133.0±5.5                    | 134.9±4.9                    | 138.7±5.7                   |           |
| Final body weight (g)                     | 436.6±10.9              | 534.8±9.9                | 508.0±9.1                              | 492.3±9.7                                 | 480.8±8.67                   | 462.9±9.75                   | 488.1±9.1                   |           |
| Water intake (g/day)                      | 53.6±5.5                | 33.3±0.1                 | 36.8±2.0                               | 35.0±3.6                                  | 37.1±1.4                     | 34.1±2.3                     | 34.7±1.2                    |           |
| Food intake (g/day)                       | 29.1±0.8                | 24.5±0.6                 | 22.7±0.4                               | 23.0±0.7                                  | 22.3±0.9                     | 22.7±0.3                     | 22.6±0.1                    |           |
| Food efficiency (g gain/g consumed)       | 0.183±0.002             | 0.289±0.007              | 0.292±0.003                            | 0.278±0.007                               | 0.278±0.013                  | 0.262±0.008                  | 0.275±0.002                 |           |
| Total food intake (kg/8 weeks)            | 1.63±0.08               | 1.37±0.06                | 1.27±0.04                              | 1.29±0.07                                 | 1.25±0.09                    | 1.26±0.03                    | 1.27±0.01                   |           |
| Liver weight (g/100g body weight)         | 3.13±0.54               | 4.38±0.51                | 4.17±0.57                              | 4.18±0.51                                 | 3.93±0.36                    | 3.80±0.53                    | 4.10±0.55                   |           |
| Adipose tissue weight(g/100g body weight) | Epididymal              | 1.39±0.36                | 2.02±0.41                              | 1.74±0.24                                 | 1.70±0.26                    | 1.63±0.33                    | 1.64±0.27                   | 1.65±0.34 |
|                                           | Retroperitoneal         | 1.67±0.49                | 2.75±0.32                              | 2.57±0.41                                 | 2.55±0.29                    | 2.20±0.38                    | 2.30±0.41                   | 2.18±0.39 |

**Notes:** Data are presented as mean ± standard error (n=8).

**Abbreviations:** a) ND, normal diet; b) HFD, high fat diet; c) C, capsaicin; d) C-NE, capsaicin nanoemulsion; e) WM, wall material.

**Table S2.** Effects of C-NE on serum lipids, ALT activities.

| Plasma Biochemical Values  | ND         | HFD        | HFD+C<br>30mg/kg<br>(Low dose) | HFD+C-NE<br>30mg/kg<br>(Low dose) | HFD+C-NE<br>60mg/kg<br>(Medium dose) | HFD+C-NE<br>90mg/kg<br>(High dose) | HFD+WM<br>Equal to<br>90mg/kg |
|----------------------------|------------|------------|--------------------------------|-----------------------------------|--------------------------------------|------------------------------------|-------------------------------|
| TC <sup>a</sup> (mmol/L)   | 1.78±0.11  | 3.80±0.06  | 3.41±0.07                      | 3.16±0.04                         | 2.91±0.12                            | 2.69±0.07                          | 3.42±0.10                     |
| TG <sup>b</sup> (mmol/L)   | 0.81±0.01  | 1.27±0.24  | 1.05±0.21                      | 0.86±0.16                         | 0.7±0.18                             | 0.58±0.12                          | 0.65±0.06                     |
| HDLC <sup>c</sup> (mmol/L) | 0.58±0.04  | 0.41±0.02  | 0.48±0.03                      | 0.50±0.05                         | 0.48±0.03                            | 0.45±0.02                          | 0.43±0.03                     |
| LDLC <sup>d</sup> (mmol/L) | 0.30±0.02  | 0.74±0.08  | 0.69±0.09                      | 0.81±0.09                         | 0.65±0.09                            | 0.50±0.12                          | 0.57±0.05                     |
| ALT <sup>e</sup> (U/L)     | 26.25±2.13 | 26.78±2.97 | 25.50±2.49                     | 24.12±2.44                        | 23.43±2.44                           | 24.43±1.46                         | 24.13±1.29                    |

**Notes:** Data are presented as mean ± standard error (n=8).

**Abbreviations:** a) TC, total cholesterol; b) TG, triglycerides; c) HDLC, high-density lipoprotein cholesterol; d) LDLC, low-density lipoprotein cholesterol; e) ALT, alanine aminotransferase.

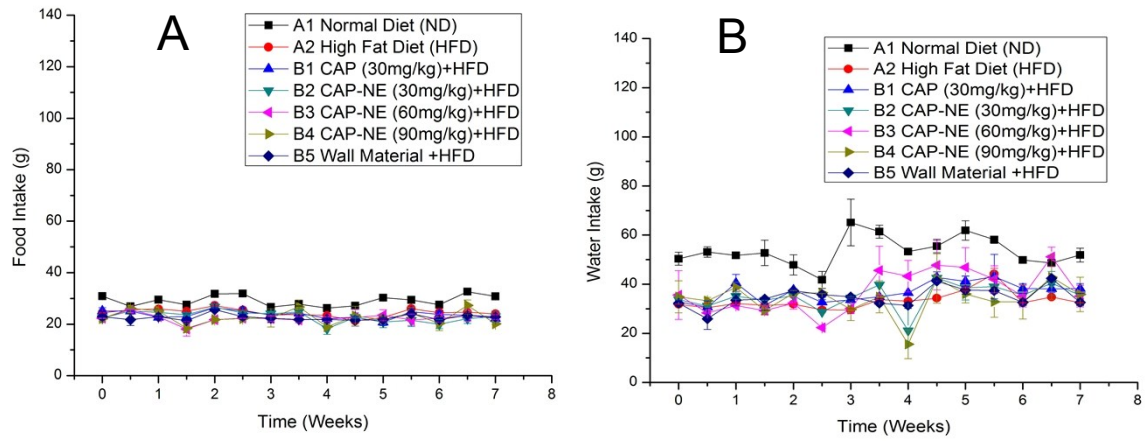

**Fig. S1** Chronic oral treatment of CAP and C-NE in male SD rats: (A) food intake of rats for 7 weeks; (B) water intake of rats for 7 weeks. Data are presented as the mean value  $\pm$  SE (n = 8); all error bars, SE.
